# Supplementary material
Source: PubMed Central journal article supplement (PMC5026598)

## **Supplementary Materials and Methods for Teh et al., "An *in vivo* reporter to quantitatively and temporally analyze the effects of CDK4/6 inhibitor-based therapies in melanoma."**

### **Western blot antibodies**

Phospho-RB1 (S780) (#9307), RB1 (#9309), p15INK4B (#4822), p16INK4A (#4824), p18INK4C (#2896), cleaved PARP (#9541), cleaved-caspase 3 (#9661), survivin (#2808), BCL-2 (#2870), ERBB3 (#4754), SOX2 (#3579) and SOD2 (#13141) antibodies were purchased from Cell Signaling Tech, Inc. (Danvers, MA). CDK4 (sc-260-G), CDK6 (sc-7181), cyclin A (sc-751) and cyclin D1 (sc-718) antibodies were purchased from Santa Cruz Biotechnology, Inc. (Dallas, TX). Actin (A2066) and fibronectin (F3648) antibodies were purchased from Sigma-Aldrich Co (St. Louis, MO). Bim/BOD antibody (ADI-AAP-330) was purchased from Enzo Life Sciences (Farmingdale, NY).

### **Pharmacokinetic Study**

Immunodeficient nude mice were treated with control chow (n=2 for day 8 and n=3 for day 15) or CDK4/6 inhibitor (429mg/kg palbociclib) chow (n=5). Blood samples were collected retro-orbitally at two separate time-points: day 8 and day 15. Plasma was separated immediately by centrifugation at 1000 RCF for 10 minutes and stored at -80°C. Analyses of plasma samples were carried out by Integrated Analytical Solutions, Inc. (Berkeley, CA) using LC-MS/MS.

### **RPPA Heatmap Analysis**

Samples were separated based on treatment types. The log<sub>2</sub> values for the drug resistant samples were used to perform two sample t-tests with 10,000 permutations, followed by multiple hypothesis test corrections for each drug group comparison. A list of significant antibodies was determined by using positive false discovery rate and fold change cutoffs of 0.05 and 1.5 respectively. Median-polished log<sub>2</sub> values of the significant antibodies were used to perform hierarchical clustering. Calculations and images were performed using the *matres*, *mafr* and *clustergram* functions in Matlab® (version 2015b).

### ***In Vivo* Statistical Analysis**

*In vivo* data has error bars representing SEM. The log-transformed tumor volumes were modeled using linear mixed effects (LME) models adjusting for correlations between repeated measures from the same animal and allowing for the mouse-specific tumor growth trajectories. The fixed effects included the treatment group (control, CDK4/6, MEK, and Combo), Day, Day<sup>2</sup>, Day<sup>3</sup> and interaction between treatment group and each power of the Day variable. That is, the Day-dependent trends were modeled as cubic polynomials in Day and coefficients for linear, quadratic, and cubic terms were allowed to be different in different treatment groups. The models also allowed for different variances of the errors in different treatment groups since even after the log transformation there were still heteroscedasticity in the errors from different treatment groups. The overall comparisons of the treatment groups (combo vs. single agents) were performed in terms of the time trends, testing the null hypotheses that the coefficients for linear, quadratic and cubic Day terms are equal for the corresponding treatment groups.

The derivative function (quadratic polynomial) for each treatment group was computed from the fitted cubic curve in each treatment group.

### **Pathway Analysis**

ToppGene (accessed 21 March 2016) was used to determine statistically significant up and down regulated pathways for comparisons between each drug resistant group. Cumulative distribution function was used to calculate the statistical significance of pathways from the Reactome pathway database. Pathways were classified as significant by using a Benjamini Hochberg positive false discovery rate cutoff of 0.001.

**Supplemental Figure Legends for Teh et al., "An *in vivo* reporter to quantitatively and temporally analyze the effects of CDK4/6 inhibitor-based therapies in melanoma."**

**Supplemental Table 1.** Summary of melanoma cell lines grouped for mutations in CDKN2A, CDK4, BRAF and NRAS. ND: not determined.

**Supplemental Figure 1.** Low concentrations of palbociclib (0.05  $\mu$ M) inhibited phosphorylation of RB1 and cyclin A2 expression in sensitive cell lines (GI50<1.5  $\mu$ M) but not in less sensitive lines.

**Supplemental Figure 2.** Mean plasma concentration for palbociclib. Mice were treated with control chow or palbociclib for 8 or 15 days.

**Supplemental Figure 3.** Sensitivity of melanoma cells to trametinib. GI50 values were generated from dose-dependent curves from MTT cell viability assays. Each bar represents the average of three independent experiments.

**Supplemental Figure 4.** Enhanced PARP cleavage in BRAF and NRAS mutant cells treated with trametinib (5 nM) or trametinib plus palbociclib (0.5  $\mu$ M).

**Supplemental Figure 5.** Clustergram and scatter plot generated from apoptosis PCR Array. A375 and SBcl2 cells were treated as indicated for 24 hours.

**Supplemental Figure 6.** Endogenous levels of survivin in a panel of melanoma cell lines.

**Supplemental Figure 7.** Representative tumor size of 1205Lu xenografts measured by tdTomato fluorescence activity (error bars represent SEM, \*p<0.0001 comparing combo to control, CDK4/6i and MEKi).

**Supplemental Figure 8.** Average weight (g) of mice bearing 1205Lu xenografts treated in each cohort (n=6 in control, n=10 in MEKi, n=9 in CDK4/6i, n=9 in COMBOi, error bars represent SD). The weight was comparable between each treatment groups.

**Supplemental Figure 9.** Average weight (g) of mice bearing WM1366 xenografts treated in each cohort (n=5 in control, n=5 in MEKi, n=5 in CDK4/6i, n=6 in COMBOi, error bars represent SD). The weight was comparable between each treatment groups.

**Supplemental Figure 10.** Modulation of E2F activity in combination treated mice bearing WM1366 xenografts that did not show complete response.

**Supplemental Figure 11.** E2F reactivation in WM1366 xenografts precedes resistance to MEK inhibitor or CDK4/6 inhibitor as measured by tdTomato activity.

**Supplemental Figure 12.** Residual tdTomato signal (p/sec/cm<sup>2</sup>/sr) in 1205Lu tumors of mice showing complete response by lack of palpable tumor. These five mice were subsequently taken off combination chow treatments to monitor durable response.

**Supplemental Figure 13.** Two heat maps of the most significantly up (A) and down (B) regulated pathways for CDK-R vs MEK-R, Combo-R vs MEK-R and Combo-R vs CDK-R (pFDR < 0.001).

**Supplemental Figure 14.** Validation of proteins from the RPPA analysis heatmap in Figure 6.

Supplemental Table 1

| Cell line | Palbociclib<br>(GI50 $\mu$ M) | CDKN2A<br>(CNV and<br>mutations) | CDK4<br>mutation  | BRAF<br>mutation | NRAS<br>mutation | References                   |
|-----------|-------------------------------|----------------------------------|-------------------|------------------|------------------|------------------------------|
| CHL-1     | 1.15                          | Mutated<br>(W110Stop,<br>LOF)    | WT                | WT               | WT               | Young RJ et al., 2014        |
| BOWES     | 0.65                          | SNP                              | WT                | WT               | WT               |                              |
| A375      | 1.26                          | Mutated<br>(E61Stop, LOF)        | WT                | V600E            | WT               | Young RJ et al., 2014        |
| WM793     | 3.7                           | WT                               | mutated<br>(K22Q) | V600E            | WT               | Satyamoorthy et al.,<br>1997 |
| 1205Lu    | 10                            | WT                               | mutated<br>(K22Q) | V600E            | WT               | Satyamoorthy et al.,<br>1997 |
| SKMEL207  | 18.44                         | WT                               | mutated<br>(R24C) | V600E            | WT               | Xing et al., 2012            |
| SBcl2     | 10                            | ND                               | WT                | WT               | Q61K             | Satyamoorthy et al.,<br>1997 |
| WM1366    | 3.88                          | ND                               | WT                | WT               | Q61L             | Satyamoorthy et al.,<br>1997 |

Supplemental Figure 1

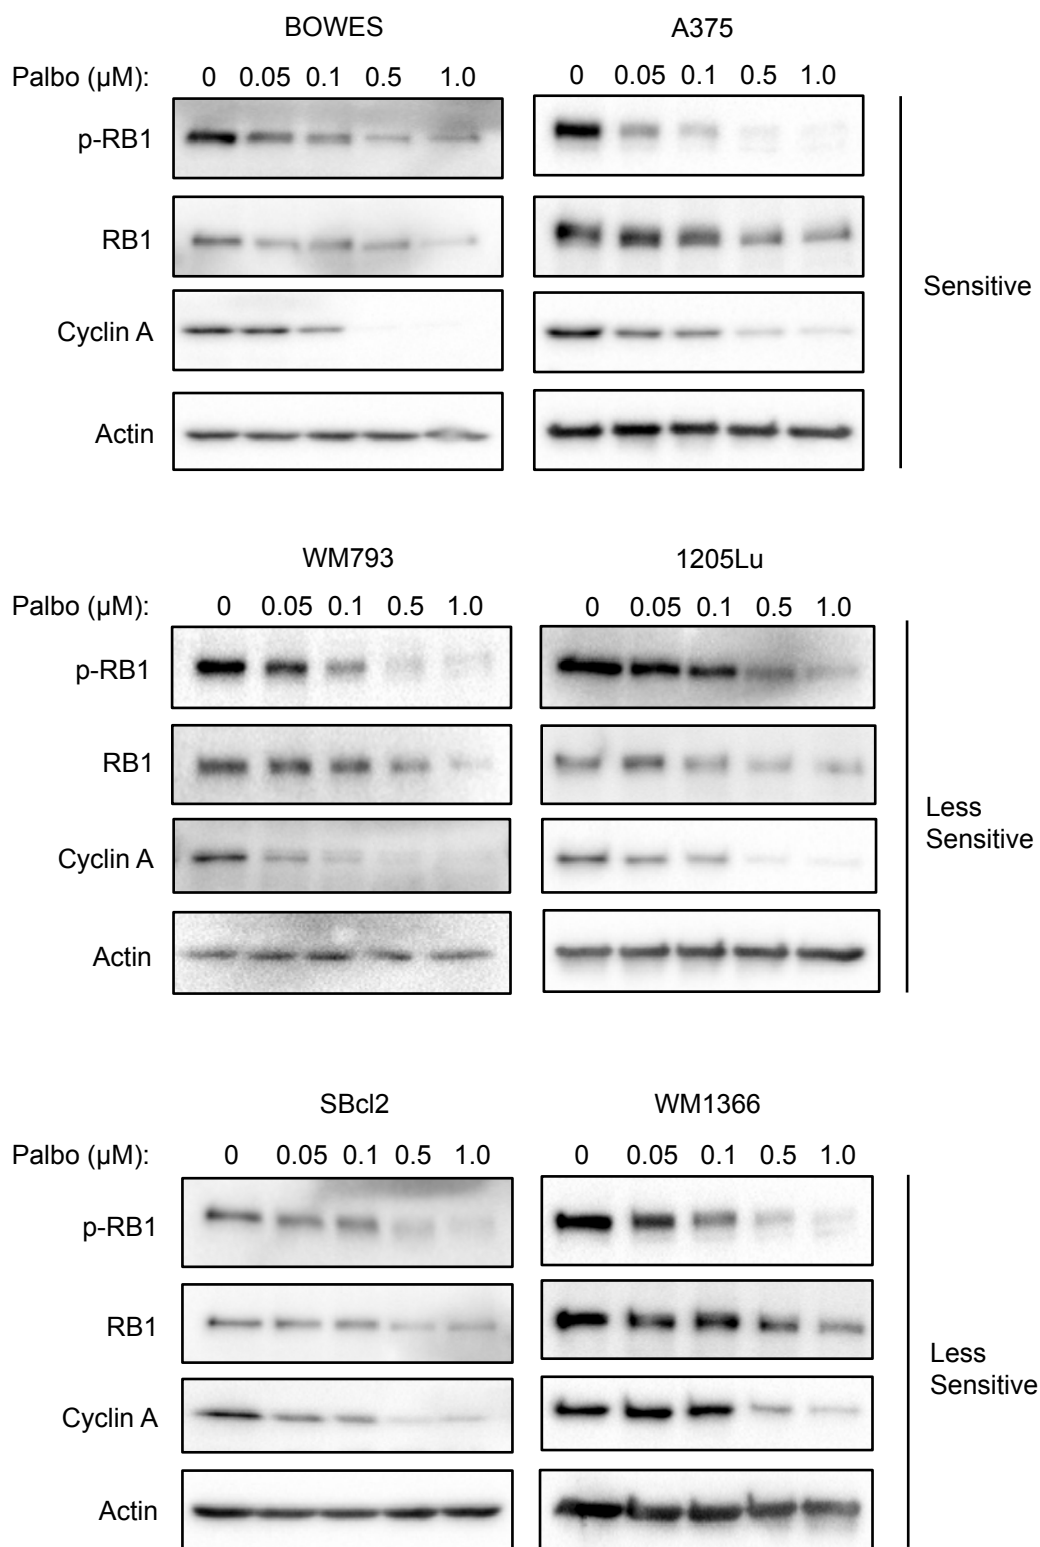

Supplemental Figure 2

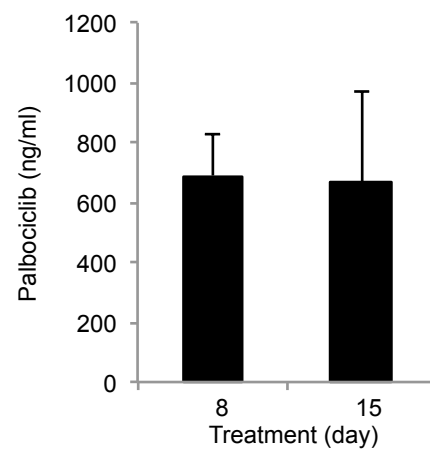

Supplemental Figure 3

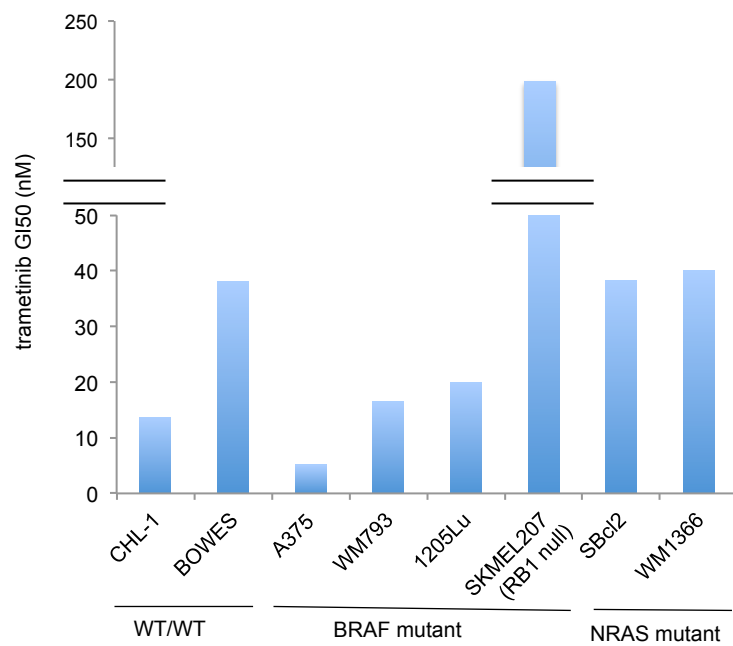

Supplemental Figure 4

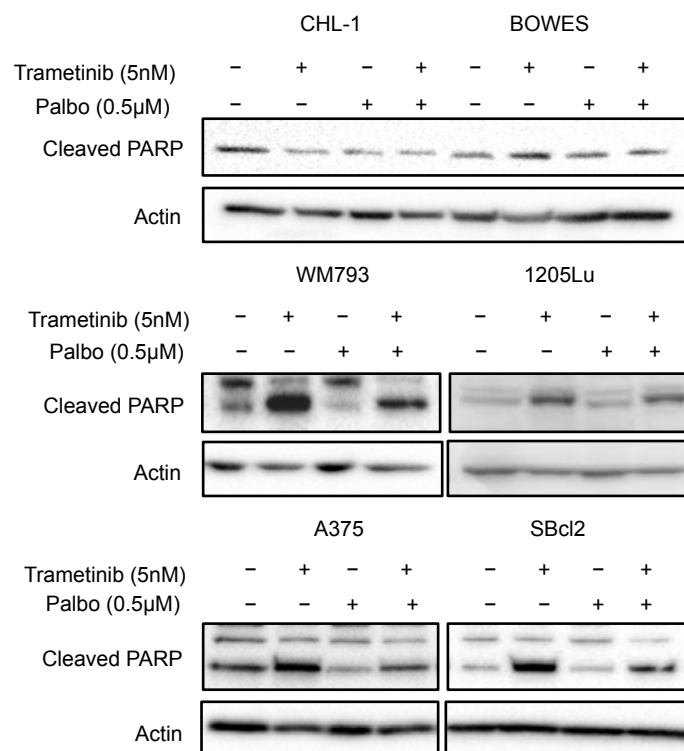

Supplemental Figure 5

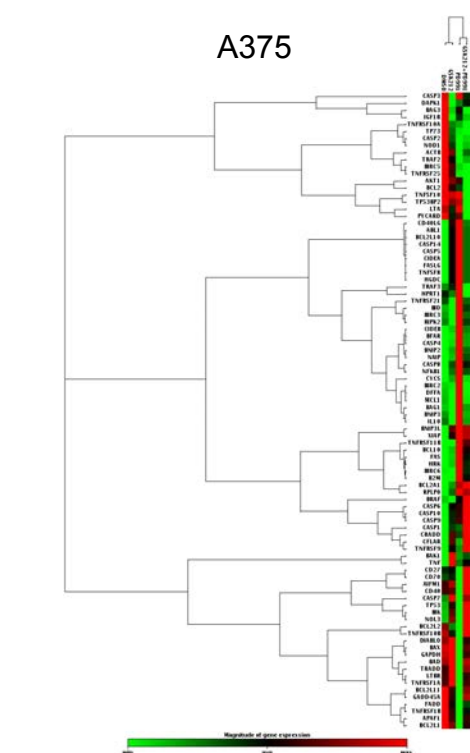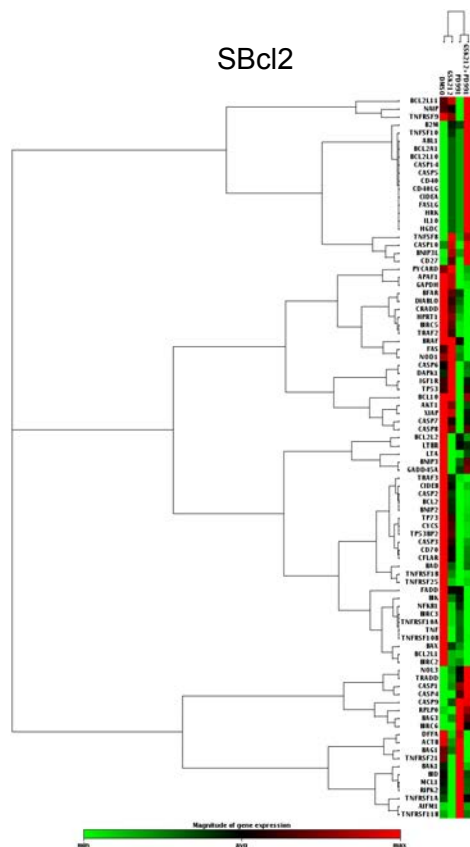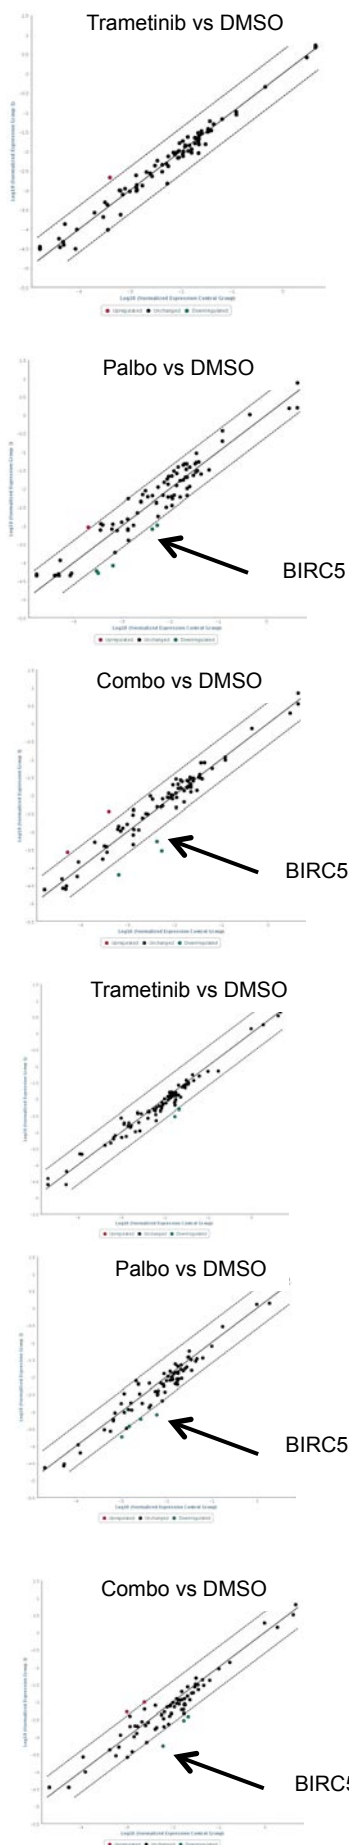

Supplemental Figure 6

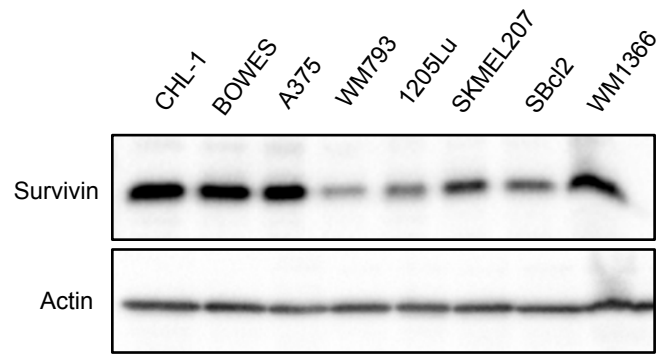

Supplemental Figure 7

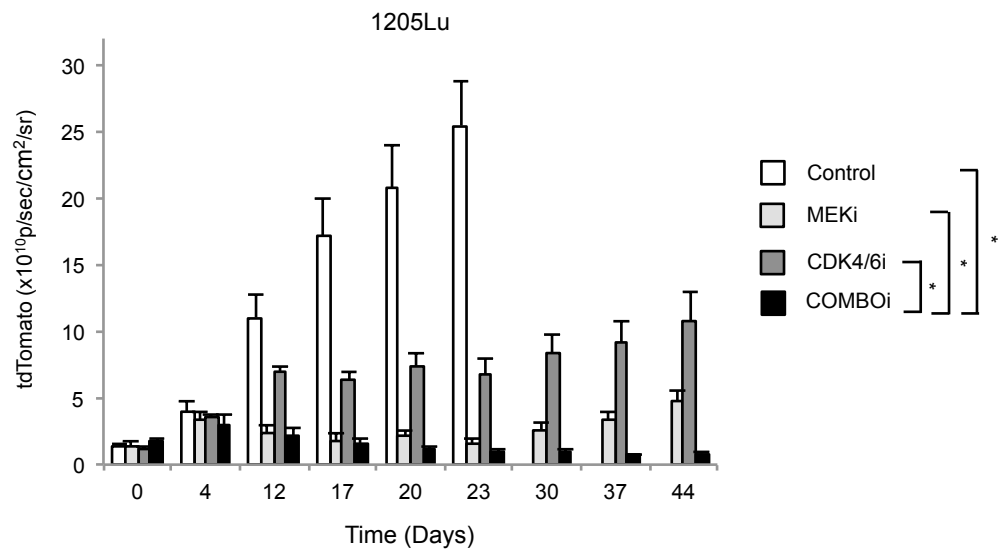

Supplemental Figure 8

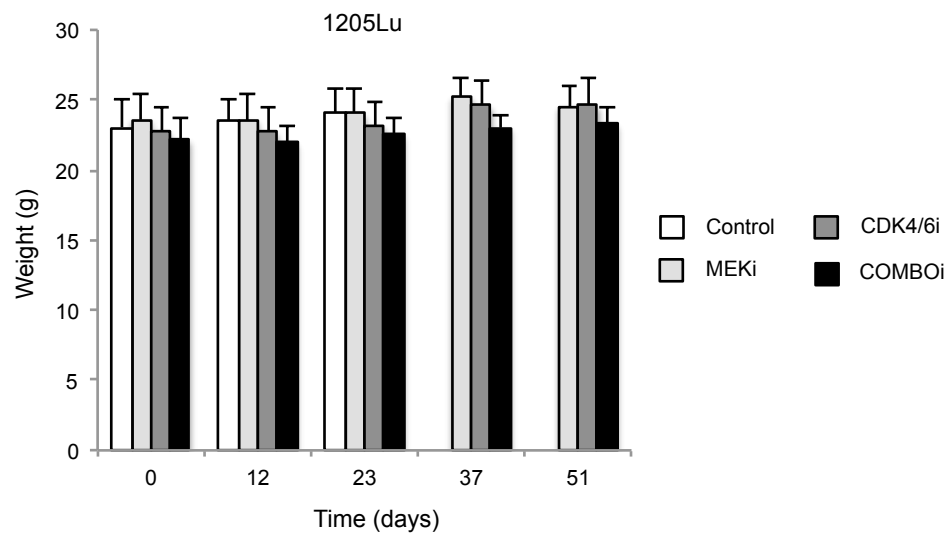

Supplemental Figure 9

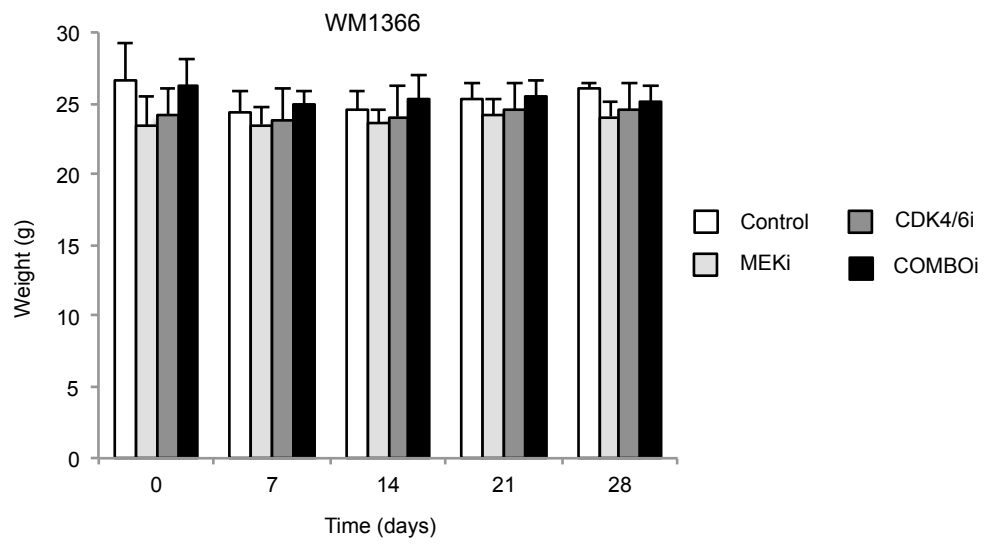

Supplemental Figure 10

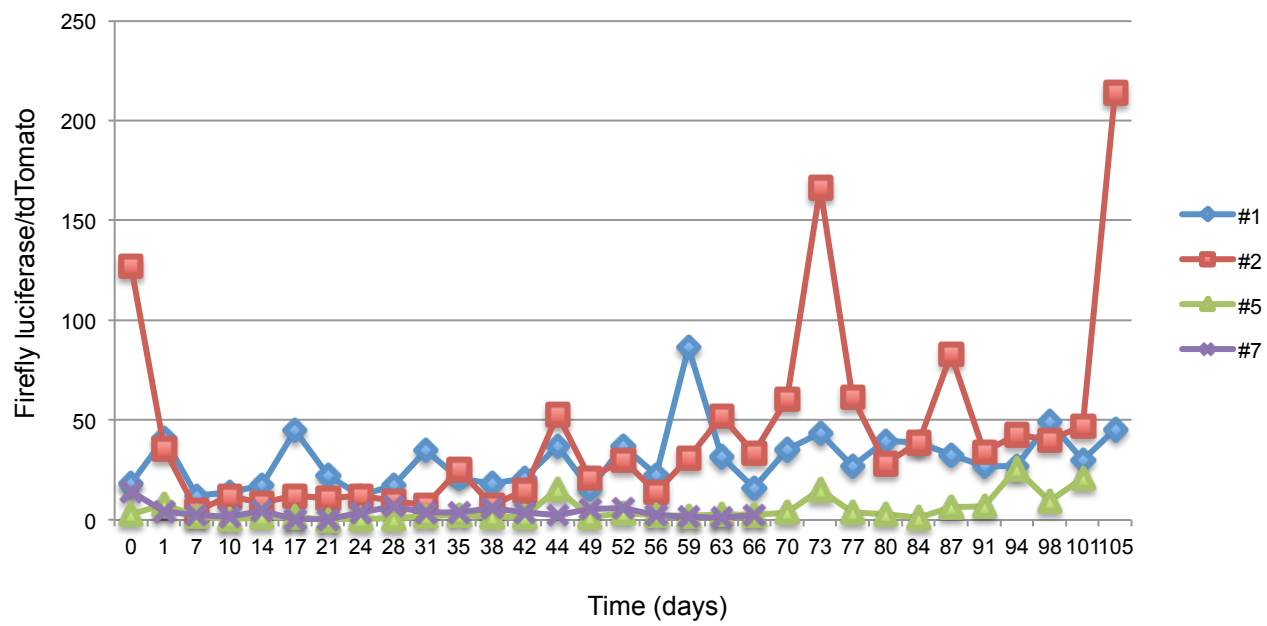

Supplemental Figure 11

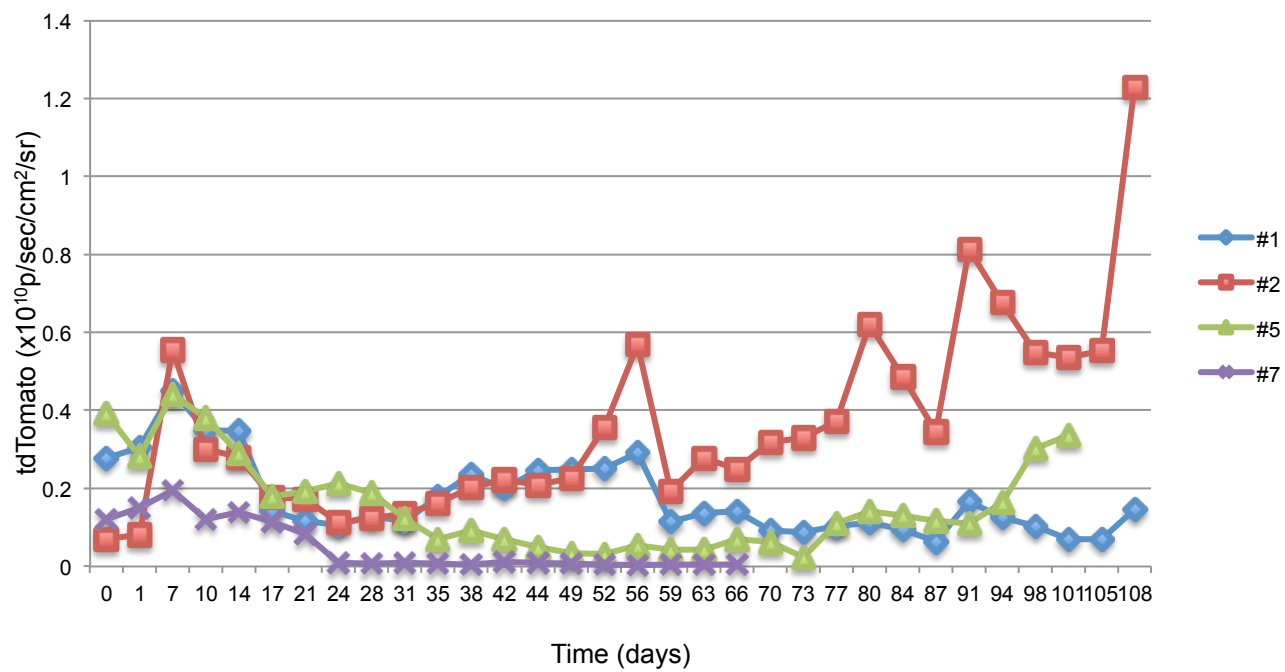

## Supplemental Figure 12

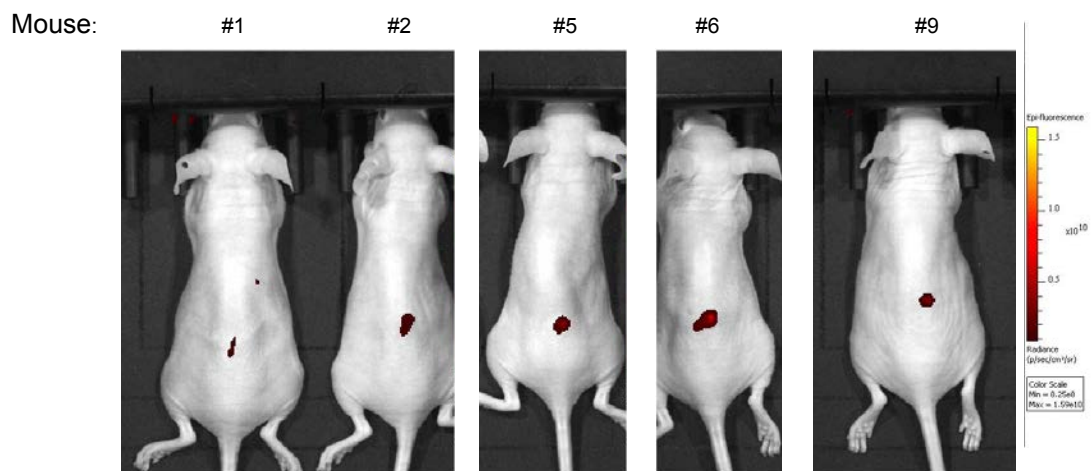

Supplemental Figure 13

A

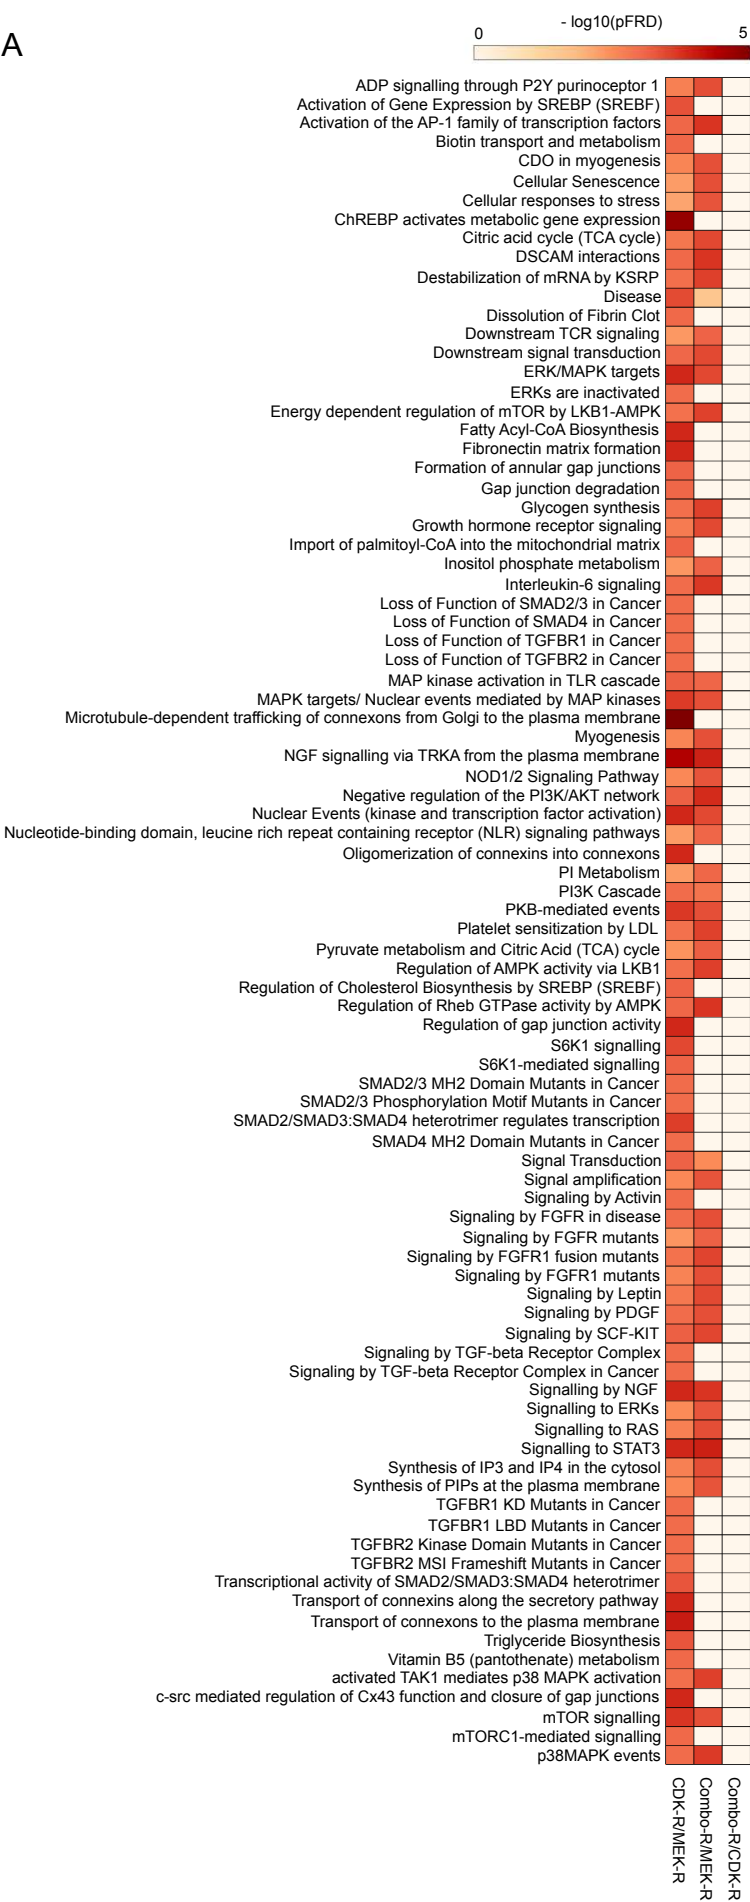

B

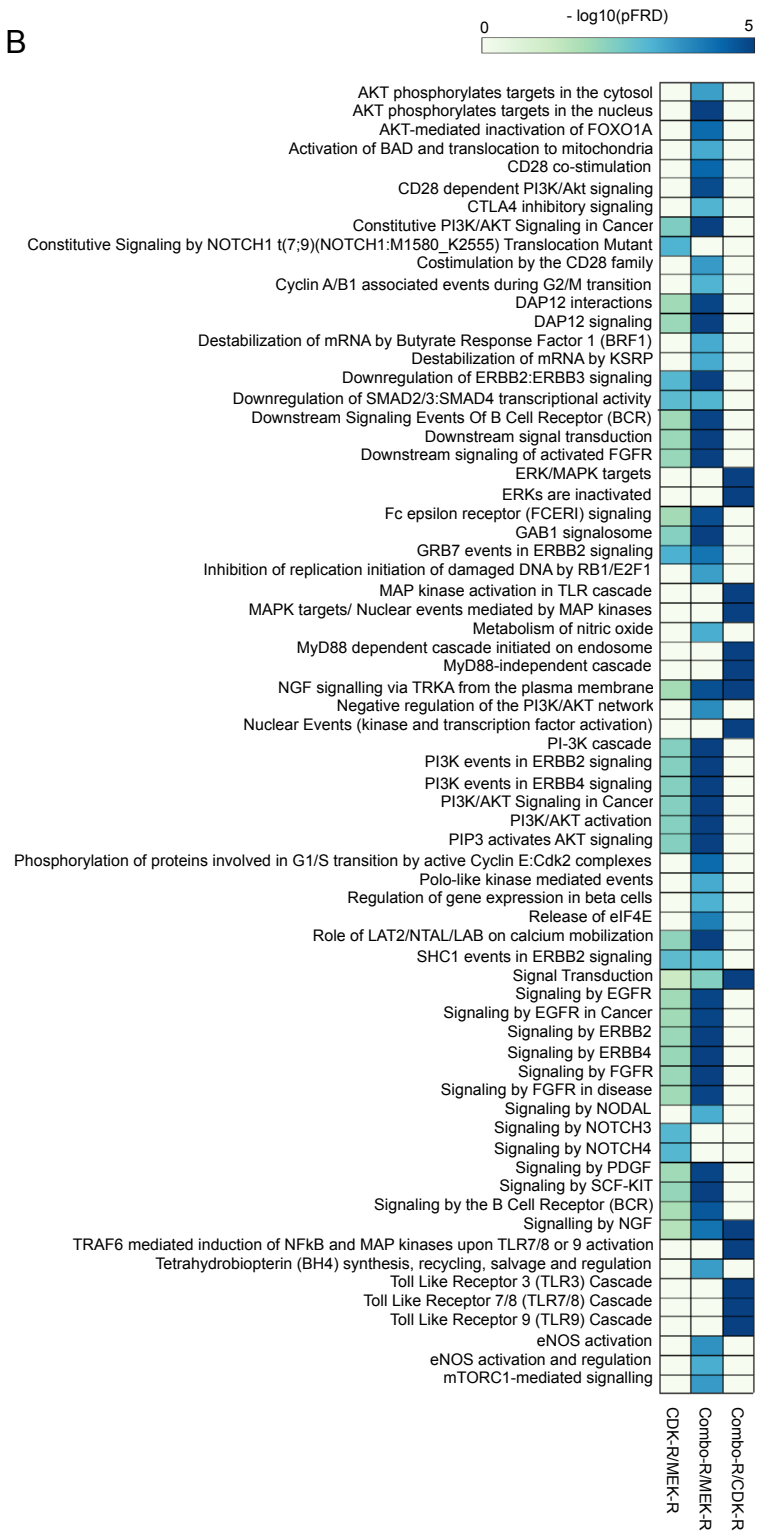

Supplemental Figure 14

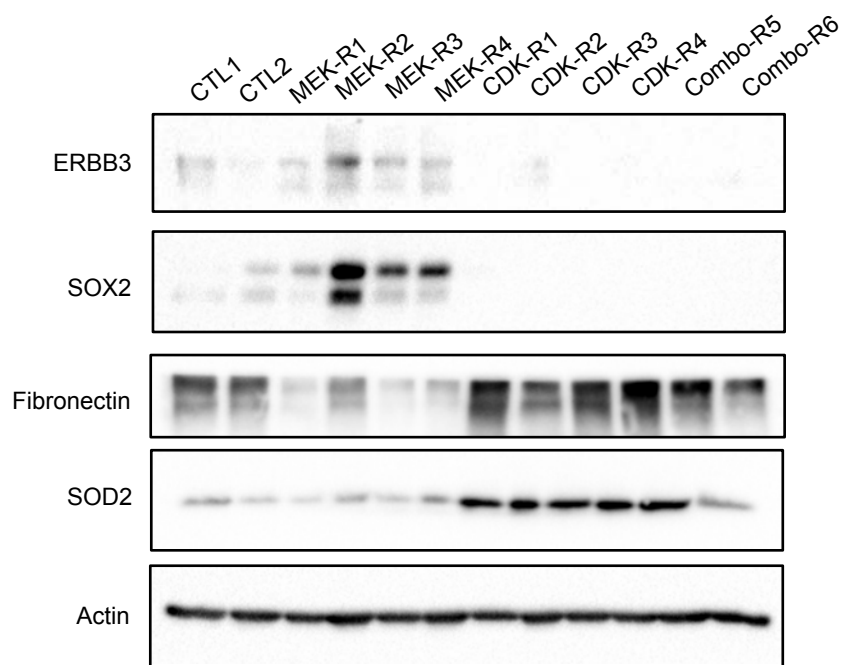

Supplement: NIHMS805207-supplement-1.pdf [file NIHMS805207-supplement-1.pdf]
